# Supplementary material
Source: PubMed Central journal article supplement (PMC4388247)
Supplement: NIHMS675840-supplement-supplement_1.pdf [file NIHMS675840-supplement-supplement_1.pdf]

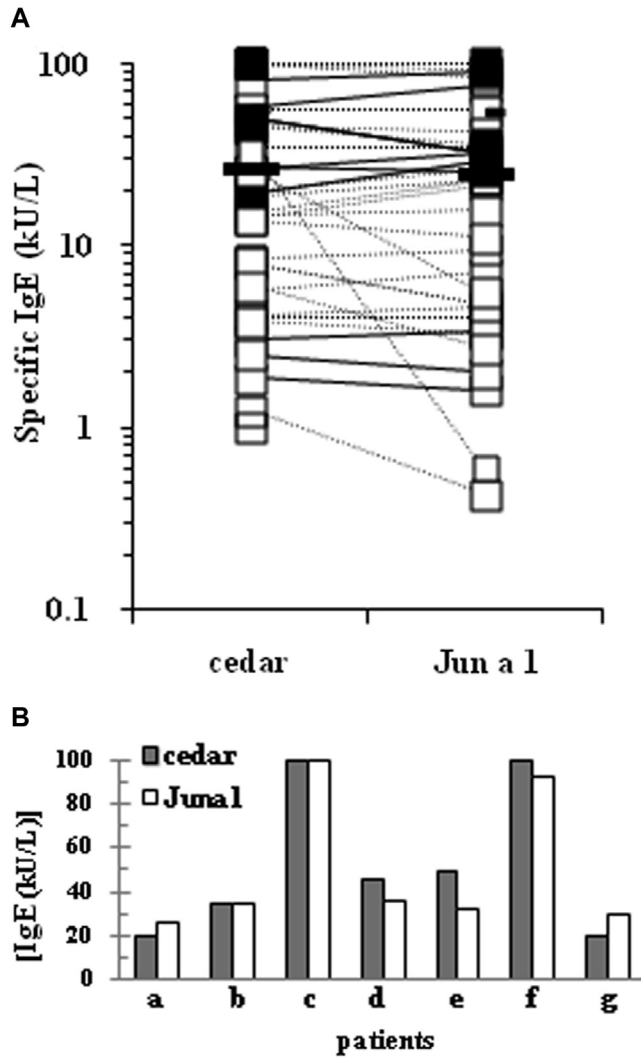

**FIG E1.** IgE binding to pollen extract and purified Jun a 1 IgE. Serum IgE antibodies against whole mountain pollen extracts and purified Jun a 1 for 35 patients with mountain cedar pollinosis were quantified by using ImmunoCap assays (A). The 7 sera selected for further analyses (a-g) are shown by *bold line* and (■) in Fig E1, A, and individually in B. The relationship of the IgE binding to whole pollen and Jun a 1 is expressed as % Jun a 1 reactivity (Fig E1, B) for each serum.

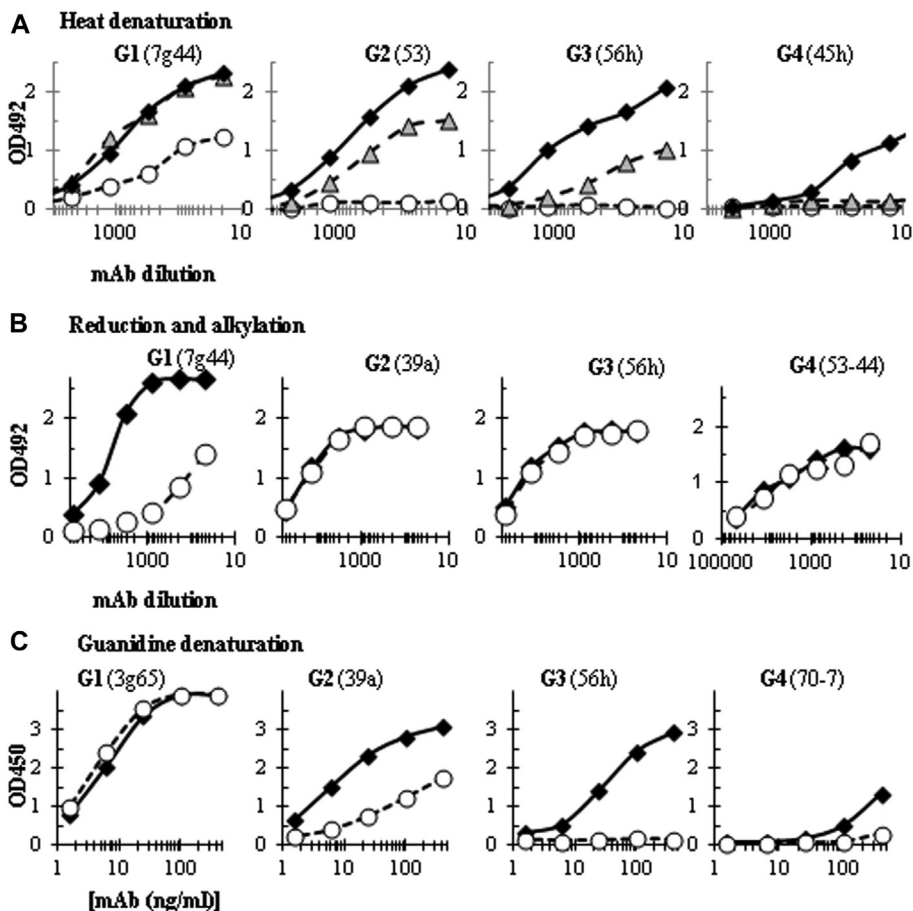

**FIG E2.** mAb binding pattern to native (◆) and denatured (○) Jun a 1. ELISA testing of the relative binding of 4 groups of mAbs (G1-G4) to wells coated with native Jun a 1 (◆) and Jun a 1-coated wells denatured by heating (: 56°C, ○: 75°C, **A**), wells coated with reduced and alkylated Jun a 1 (○, **B**), wells coated with Jun a 1 and then treated with 6 mol/L guanidine (○, **C**). The results indicate that epitopes recognized by mAbs G2 to G4 were disrupted by heat (56°C and 75°C), while the epitope for mAb G1 was only partially lost after exposure to 75°C, but was completely disrupted after reduction and alkylation, which breaks disulfide bonds.

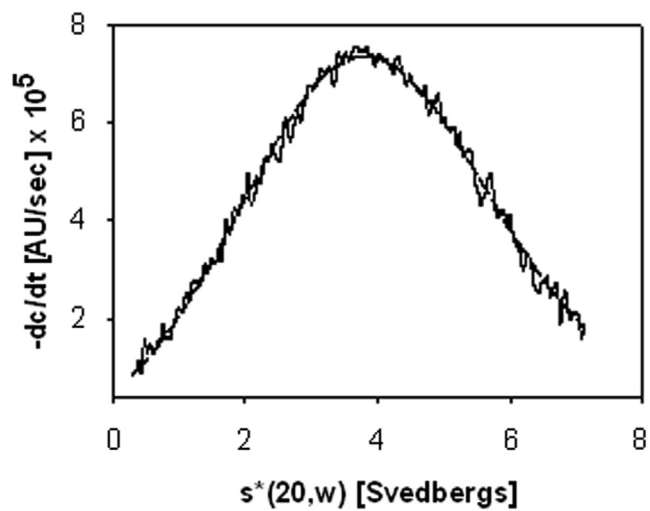

**FIG E3.** Molecular mass of Jun a 1. Ultracentrifugation data indicate that Jun a 1 is globular and exists as a monomer with a molecular mass of approximately 42 kDa in a non-denaturing solution. The mass and shape are consistent with glycosylation at several sites.

**TABLE E1.** Classification of anti-Jun a 1 mAb by ELISA inhibition

| Unlabeled mAb | Biotinylated mAb |               |               |               |                |               |               |                |
|---------------|------------------|---------------|---------------|---------------|----------------|---------------|---------------|----------------|
|               | Group 1          |               | Group 2       |               | Group 3        |               | Group 4       |                |
|               | 7g44             | 3g65          | 39a80         | 84e78         | 56h58          | 58g           | 70-7          | 53-44          |
| Group 1       |                  |               |               |               |                |               |               |                |
| 7g44          | <i>83 ± 5</i>    | <i>80 ± 2</i> | 3 ± 3         | 5 ± 4         | 0 ± 0          | 3 ± 5         | 2 ± 1         | 2 ± 2          |
| 3g65          | <i>81 ± 4</i>    | <i>79 ± 2</i> | 3 ± 2         | 3 ± 4         | 4 ± 6          | 5 ± 5         | 0 ± 0         | 2 ± 3          |
| Group 2       |                  |               |               |               |                |               |               |                |
| 39a80         | 2 ± 2            | 1 ± 2         | <i>84 ± 5</i> | <i>80 ± 7</i> | 7 ± 8          | 14 ± 10       | 1 ± 1         | 4 ± 2          |
| 84e78         | 1 ± 2            | 3 ± 3         | <i>81 ± 6</i> | <i>88 ± 6</i> | 3 ± 3          | 5 ± 4         | 2 ± 1         | 2 ± 3          |
| Group 3       |                  |               |               |               |                |               |               |                |
| 56h58         | 6 ± 5            | 3 ± 3         | 2 ± 2         | 2 ± 3         | <i>92 ± 6</i>  | <i>79 ± 3</i> | 6 ± 9         | 7 ± 3          |
| 58g           | 0 ± 0            | 3 ± 6         | 6 ± 2         | 5 ± 4         | <i>85 ± 12</i> | <i>81 ± 4</i> | 0 ± 1         | 4 ± 7          |
| Group 4       |                  |               |               |               |                |               |               |                |
| 70-7          | 4 ± 6            | 0 ± 0         | 1 ± 2         | 2 ± 4         | 2 ± 3          | 5 ± 4         | <i>78 ± 4</i> | <i>75 ± 9</i>  |
| 53-44         | 6 ± 4            | 1 ± 2         | 1 ± 2         | 3 ± 2         | 6 ± 5          | 7 ± 3         | <i>77 ± 2</i> | <i>73 ± 10</i> |

The values are expressed as % inhibition of the binding of biotinylated mAb (columns) to Jun a 1 by the preincubation with excess unlabeled mAb (rows). Values in italics and boldface indicate the autologous inhibition (labeled antibody inhibited by the same antibody without label). The remainder of the numbers indicates that the members of each of these 4 groups do not cross-react with other groups.

**TABLE E2.** Characteristics of the study population (n = 35)

| No. | Age (y) | Sex | Medication                               | Cosensitization                             | Diseases                     | Total IgE (kU/L) |
|-----|---------|-----|------------------------------------------|---------------------------------------------|------------------------------|------------------|
| 1   | 54      | F   | Diphenhydramine, loratadine              | Trees, grasses, dust mites                  |                              | 110              |
| 2   | 66      | F   | Fexofenadine, fluticasone, olopatadine   | Mold, dust mite                             | Hypertension                 | 127              |
| 3   | 46      | M   |                                          | Oak                                         |                              | 73.5             |
| 4   | 45      | F   |                                          | Dust mite, cat, dog                         |                              | 241              |
| 5   | 59      | M   |                                          | Trees, grasses, ragweeds, cat, dog          | Hypertension                 | 88.4             |
| 6   | 29      | F   |                                          | Grasses, ragweed, mold, dust mite, cat, dog |                              | 690              |
| 7   | 41      | M   |                                          |                                             |                              | 226              |
| 8   | 42      | M   |                                          |                                             |                              | 151              |
| 9   | 35      | F   | Fexofenadine, fluticasone                | Trees, grasses, ragweeds, mold, dust mite   |                              | 234              |
| 10  | 10      | M   | Mometasone, desloratadine                | Trees, grasses, ragweed, dust mite, mold    |                              | 1,209            |
| 11  | 54      | M   |                                          | Grasses, mold, dust mite                    |                              | 265              |
| 12  | 25      | F   | Mometasone, desloratadine                | Pine, grasses, ragweed, mold, dust          |                              | 290              |
| 13  | 28      | M   | Mometasone, desloratadine                |                                             | Arthritis, scoriasis, asthma | 50.8             |
| 14  | 65      | M   | Allergy shots                            | Elm, ragweed, dust, mold                    | Arthritis, hypertension      | 27.8             |
| 15  | 38      | F   | Diphenhydramine, pseudoephedrine         | Trees, grasses, ragweed                     |                              | 465              |
| 16  | 28      | M   |                                          | Elm, grasses, ragweed                       | Asthma                       | 17.7             |
| 17  | 45      | F   | Loratadine                               | Oak, grasses, ragweed, dust                 |                              | 72.9             |
| 18  | 54      | F   |                                          | Oak, ragweed, grasses, dust                 |                              | 65.2             |
| 19  | 33      | M   |                                          | Oak, grasses, ragweed, mold                 |                              | 175              |
| 20  | 15      | F   | Loratadine, fluticasone                  | Pecan, pine, ragweed                        |                              | 137              |
| 21  | 46      | F   |                                          | Oak, elm, ragweed, dust mite, mold          | Arthritis, hypertension      | 205              |
| 22  | 48      | F   | Fluticasone, diphenhydramine, loratadine | Oak, grasses, ragweed, mold, dust mite      |                              | 144              |
| 23  | 46      | M   | Fluticasone                              | Pecan, oak, ragweed, dust mite              | Hypertension                 | 73.5             |
| 24  | 32      | F   |                                          | Ragweed                                     |                              | 18.7             |
| 25  | 38      | M   |                                          | Oak, elm, grasses, ragweed                  |                              | 174              |
| 26  | 38      | F   |                                          | Grasses, ragweed                            |                              | 20.6             |
| 27  | 39      | M   |                                          | Ragweed, dust mite                          |                              | 490              |
| 28  | 27      | F   |                                          |                                             |                              | 159              |
| 29  | 42      | F   |                                          |                                             |                              | 691              |
| 30  | 21      | F   |                                          |                                             |                              | 254              |
| 31  | 45      | F   |                                          |                                             |                              | 56.4             |
| 32  | 24      | F   |                                          |                                             |                              | 284              |
| 33  | 47      | F   |                                          |                                             |                              | 1,020            |
| 34  | 22      | F   |                                          |                                             |                              | 376              |
| 35  | 49      | F   |                                          |                                             |                              | 247              |

F, Female; M, male.
